# Supplementary material
Source: Elsevier journal article supplement (https://www.sciencedirect.com/science/article/pii/S0300893222002792)

*Gómez-Bueno, M, et al. Asistencia ventricular de larga duración en España (2007-2020). I informe del registro REGALAD*

**MATERIAL ADICIONAL****Anexo 1 del material adicional**

Colaboradores de Registro Español de Asistencia Ventricular de Larga Duración (2007-2020)

| <b>Centros</b>                                                       | <b>Colaboradores</b>                                                                                                                                                                                                                                                             |
|----------------------------------------------------------------------|----------------------------------------------------------------------------------------------------------------------------------------------------------------------------------------------------------------------------------------------------------------------------------|
| Hospital Universitario Reina Sofía, Córdoba                          | José María Arizón del Prado                                                                                                                                                                                                                                                      |
| Hospital Universitario Virgen de las Nieves, Granada                 | Andrea Ferreira Marzal, Manuel García Delgado, Violeta Chica Sáez                                                                                                                                                                                                                |
| Hospital Universitario Virgen del Rocío, Sevilla                     | Antonio Grande-Trillo, José Manuel Sobrino Márquez, Alejandro Adsuar Gómez, José Miguel Borrego Domínguez                                                                                                                                                                        |
| Hospital Universitario Central de Asturias, Oviedo, Asturias         | Jacobo Silva Guisasola, Félix Ezequiel Fernández Suárez, José Alonso Muñiz, Cristina Fidalgo Muñiz                                                                                                                                                                               |
| Hospital Universitari Son Espases, Palma de Mallorca, Islas Baleares | Jaume Ausias Pons Llinares, José Ignacio Sáez de Ibarra, Laura Vidal Bonet, Delfina Fletcher Sanfeliu, Daniel Padrol Bages, Pere Andreu Pericas Ramis, Vicente Peral Disdier, Alberto Rodríguez Salgado, María Riera Sagrera, Germán Gómez Romero, Antonia María Verger Bennasar |
| Hospital Universitario Marqués de Valdecilla, Santander, Cantabria   | Aurelio Sarralde Aguayo, Ángela Canteli Álvarez, Marta Ruiz Lera, Cristina Castrillo Bustamante                                                                                                                                                                                  |
| Complejo Asistencial Universitario, Salamanca                        | José María González Santos                                                                                                                                                                                                                                                       |
| Hospital Clínico Universitario, Valladolid                           | Salvatore Di Stefano, Luis de la Fuente Galán, Alexander Stepanenko                                                                                                                                                                                                              |
| Hospital Clinic i Provincial, Barcelona                              | Elena Sandoval, Marta Farrero, Ana García-Álvarez, Manuel Castellá                                                                                                                                                                                                               |

*Gómez-Bueno, M, et al. Asistencia ventricular de larga duración en España (2007-2020). I informe del registro REGALAD*

|                                                                          |                                                                                                                                                                                                                                                                                                                                                                                               |
|--------------------------------------------------------------------------|-----------------------------------------------------------------------------------------------------------------------------------------------------------------------------------------------------------------------------------------------------------------------------------------------------------------------------------------------------------------------------------------------|
| Hospital Universitari de Bellvitge, L'Hospitalet de Llobregat, Barcelona | Carles Díez-López, Nicolás Manito, Elena García-Romero, Albert Miralles, Fabrizio Sbraga, Arnau Blasco, Karina Osorio                                                                                                                                                                                                                                                                         |
| Hospital de la Santa Creu i Sant Pau, Barcelona                          | Manel Tauron, Antonino Ginel, Marta de Antonio, Vicens Brossa, Sonia Mirabet                                                                                                                                                                                                                                                                                                                  |
| Hospital Germans Trias i Pujol, Badalona, Barcelona                      | Antoni Bayes-Genis, Josep Lupón, Evelyn Santiago-Vacas, Christian Muñoz, Elisabet Zamora                                                                                                                                                                                                                                                                                                      |
| Hospital Universitario La Fe, Valencia                                   | Raquel López-Vilella, Víctor Donoso Trenado, Ignacio Sánchez-Lázaro                                                                                                                                                                                                                                                                                                                           |
| Complejo Hospitalario Universitario A Coruña, A Coruña                   | María G. Crespo Leiro, David Couto Mallón, María J Paniagua Martin, Gonzalo Barge Caballero, José J Cuenca Castillo                                                                                                                                                                                                                                                                           |
| Hospital Álvaro Cunqueiro, Vigo, Pontevedra                              | Juan José Legarra                                                                                                                                                                                                                                                                                                                                                                             |
| Hospital Universitario 12 de Octubre, Madrid                             | Andrea Eixerés, Juan Delgado Jiménez                                                                                                                                                                                                                                                                                                                                                          |
| Hospital General Universitario Gregorio Marañón, Madrid                  | Francisco Fernández Avilés, Eduardo Zatarain, Carlos Ortiz-Bautista, Zorba Blázquez, María Jesús Valero, Iago Sousa, Manuel Martínez Sellés, Miriam Juárez, Paula Navas, Adolfo Villa, Jorge García Carreño, Ángel Pinto, Manuel Ruiz Fernández, Álvaro Pedraz, Gregorio Cuerpo, Hugo Rodríguez-Abella, Javier Hortal, Jose María Barrio, Patricia Muñoz, Maricela Valerio, Cristina Pascual. |
| Hospital Universitario La Paz, Madrid                                    | Inés Ponz de Antonio, Ali Ayaón Albarrán                                                                                                                                                                                                                                                                                                                                                      |
| Hospital Universitario Puerta de Hierro, Majadahonda, Madrid             | Javier Segovia Cubero, Francisco Hernández Pérez, Cristina Mitroi, Mercedes Rivas Lasarte, Sara Lozano Jiménez, José María Vieitez Flórez, Santiago                                                                                                                                                                                                                                           |

*Gómez-Bueno, M, et al. Asistencia ventricular de larga duración en España (2007-2020). I informe del registro REGALAD*

|                                                                 |                                                                                                                                                                                                |
|-----------------------------------------------------------------|------------------------------------------------------------------------------------------------------------------------------------------------------------------------------------------------|
|                                                                 | Serrano Fiz, Susana Villar García, Ana González<br>Román, Mercedes Vidal, Reyes Iranzo, Teresa Soria<br>Gómez                                                                                  |
| Hospital Universitario Ramón y Cajal, Madrid                    | Susana del Prado, Marta Jiménez-Blanco Bravo,<br>Gonzalo Alonso Salinas, David Cordero Pereda,<br>Manuel Jiménez-Mena, José Luis Zamorano, José<br>López Menéndez, Jorge Rodríguez-Roda Stuart |
| Hospital Clínico Universitario Virgen de la Arrixaca,<br>Murcia | Iris Garrido-Bravo, Sergio Cánovas-López                                                                                                                                                       |
| Clínica Universidad de Navarra, Pamplona, Navarra               | Gregorio Rábago, Leticia Jimeno San Martín                                                                                                                                                     |

Gómez-Bueno, M, et al. Asistencia ventricular de larga duración en España (2007-2020). I informe del registro REGALAD

**Anexo 2 del material adicional**

**DEFINICIÓN DE EVENTOS ADVERSOS**

**1. Disfunción de la asistencia ventricular**

Fallo de uno o más de los componentes de la asistencia mecánica circulatoria que podría potencialmente llevar a un estado de bajo gasto o muerte. Si el fallo fue iatrogénico o provocado por el receptor se clasifica como tal.

La disfunción de la asistencia ventricular se clasifica según el componente que falle:

- a) Disfunción de la bomba (componentes de la asistencia en contacto directo con la sangre o la cámara aérea de los ventrículos pulsátiles). En el caso particular de trombosis de la bomba confirmada, se debe documentar trombo en el dispositivo o en los conductos que acceden a ella.
- b) Disfunción de otros componentes (por ejemplo: cable de conexión, compresor neumático externo, controlador, unidad de alimentación de corriente eléctrica, baterías, etc.)

**2. Infección mayor**

Infección clínica acompañada de dolor, fiebre, supuración o leucocitosis que precise tratamiento antimicrobiano (no profilaxis). Se requiere un cultivo positivo de la zona de infección, a no ser que la evidencia clínica sea muy clara y se indique tratamiento a pesar de cultivos negativos. Las categorías de infección son las siguientes:

- a) Las infecciones específicas de la asistencia: se refieren a aquellas directamente relacionadas con algún componente del sistema, incluido el cable de transmisión, el túnel del cable de transmisión, el bolsillo de la bomba, la propia bomba y la cánula de entrada o salida. Estas infecciones específicas se pueden dividir en: infecciones superficiales o profundas. Una infección superficial afecta al tejido blando fuera de la fascia y las capas musculares, mientras que las infecciones profundas se extienden más allá de estas estructuras.

*Gómez-Bueno, M, et al. Asistencia ventricular de larga duración en España (2007-2020). I informe del registro REGALAD*

- b) Las infecciones relacionadas con la asistencia: se refieren a aquellas que pueden verse afectadas por el implante de la asistencia, incluidas la endocarditis infecciosa, bacteriemias y la mediastinitis. Las infecciones relacionadas no se limitan a los pacientes con asistencias. La presencia de una asistencia, sin embargo, complica su diagnóstico clínico y manejo, y puede aumentar su incidencia en comparación con la de los pacientes sin asistencia.
- c) Infección localizada no relacionada con la asistencia ventricular: aquella que no tiene relación directa con la asistencia ventricular, por ejemplo, infección de orina, neumonía, gastroenteritis, etc. y sin evidencia de sepsis sistémica.

### **3. Evento neurológico**

Déficit neurológico global o focal, temporal o permanente documentado por una exploración neurológica. En los casos de enfermedad cerebrovascular se debe distinguir entre accidente isquémico transitorio y accidente vascular cerebral:

- a) Accidente isquémico transitorio: Evento agudo que revierte por completo en menos de 24 horas sin evidencia de infarto por prueba de imagen.
- b) Accidente vascular cerebral (isquémico/hemorrágico): Evento que persiste más de 24 horas o menos de 24 horas, pero con evidencia de infarto en la prueba de imagen.

### **4. Hemorragia mayor**

Episodio de hemorragia interna o externo que lleve a uno o más de los siguientes:

- a) Muerte
- b) Reintervención quirúrgica
- c) Hospitalización
- d) Transfusión de hematíes según los siguientes criterios:
- Primeros 7 días post-implante:
    - Adultos (> 50 kg):  $\geq 4$  concentrados de hematíes en 24 horas

*Gómez-Bueno, M, et al. Asistencia ventricular de larga duración en España (2007-2020). I informe del registro REGALAD*

- Pediátricos (< 50 kg):  $\geq 20$  cc/kg de concentrados de hematíes en 24 horas
- 7 días post-implante: Cualquier transfusión de concentrados de hematíes.

*Nota: Una hemorragia intracraneal no se recoge en este apartado. Se debe recoger como un evento neurológico*

## **5. Insuficiencia respiratoria**

Insuficiencia respiratoria que requiere reintubación, traqueostomía o imposibilidad de desconectar del soporte mecánico ventilatorio en los 6 días posimplante de la asistencia ventricular.

No reportar intubación por una reintervención o intubación temporal para procedimientos diagnósticos o terapéuticos.

## **6. Insuficiencia cardiaca derecha**

Síntomas y signos persistentes de disfunción del ventrículo derecho (presión venosa central  $> 18$  mm Hg con índice cardiaco  $< 2,3$  l/min/m<sup>2</sup> en ausencia de presión capilar pulmonar  $> 18$  mm Hg, taponamiento, arritmias ventriculares o neumotórax) que requieran de óxido nítrico o tratamiento inotrópico durante  $> 1$  semana en cualquier momento después del implante de la asistencia ventricular.

Clasificación de la insuficiencia cardiaca (IC) derecha:

a) IC derecha leve: cumple con 2 de los 4 criterios clínicos enumerados a continuación:

- ☐ Presión venosa central  $> 18$  mmHg o presión media de la aurícula derecha  $> 18$  mmHg
- ☐ Índice cardiaco  $< 2,3$  l/min/m<sup>2</sup> (por Swan)
- ☐ Ascitis o evidencia de edema periférico moderado o grave
- ☐ Evidencia de presión venosa central elevada por eco (vena cava dilatada, desplazamiento del septo interventricular hacia la izquierda), examen físico (signos de aumento de la presión venosa yugular)

Gómez-Bueno, M, et al. Asistencia ventricular de larga duración en España (2007-2020). I informe del registro REGALAD

- b) IC derecha moderada: inotrópico o vasodilatador pulmonar intravenoso o inhalado (p. ej., prostaglandina E u óxido nítrico inhalado) durante más de 1 semana en cualquier momento después de la implantación de una asistencia ventricular aislada izquierda.
- c) IC derecha grave: La que es causa de muerte o necesidad de soporte circulatorio mecánico derecho

## **7. Tromboembolismo arterial no sistema nervioso central**

Déficit en la perfusión arterial sistémica en cualquier órgano (excluidos los eventos neurológicos) debido a tromboembolismo, confirmado por:

- a) Hallazgos clínicos y de exploraciones complementarias
- b) Hallazgos quirúrgicos
- c) Autopsia

## **8. Alosensibilización:**

Desarrollo de nuevos anticuerpos antiHLA o positivización del panel de anticuerpos reactivos tras el implante de la asistencia ventricular.

Gómez-Bueno, M, et al. Asistencia ventricular de larga duración en España (2007-2020). I informe del registro REGALAD

**Anexo 3 del material adicional**

**CLASIFICACIÓN INTERMACS**

**INTERMACS 1:** *Critical cardiogenic shock.* Inestabilidad hemodinámica grave y rápidamente progresiva pese a dosis crecientes de catecolaminas y/o soporte circulatorio mecánico, con hipoperfusión crítica de órganos diana (*crashing and burning*)

**INTERMACS 2:** *Progressive decline.* Paciente hospitalizado que precisa soporte inotrópico intravenoso y a pesar de ello sufre deterioro progresivo de la función renal, el estado nutricional o los signos de congestión (*sliding on inotropes*)

**INTERMACS 3:** *Stable but Inotrope dependent.* Paciente hospitalizado o ambulatorio clínicamente estable pero dependiente de dosis bajas o intermedias de inotrópicos o de asistencia circulatoria temporal, con imposibilidad para su retirada por hipotensión, empeoramiento sintomático o disfunción de órganos.

**INTERMACS 4:** *Resting Symptoms.* Paciente ambulatorio, con medicación oral, pero con síntomas de congestión en reposo o con las actividades de la vida diaria (asearse o vestirse). Este paciente suele presentar recaídas sintomáticas frecuentes, habitualmente con sobrecarga hídrica.

**INTERMACS 5:** *Exertion Intolerant* Paciente ambulatorio, confortable en reposo, pero incapaz de participar en cualquier actividad fuera de casa. Este paciente suele tener un estado de volumen crónicamente elevado y un cierto grado de disfunción renal (*housebound*)

**INTERMACS 6:** *Exertion Limited* Paciente ambulatorio, sin evidencia de congestión en reposo, capaz de realizar actividades ligeras fuera del hogar, pero se fatiga a los pocos minutos de cualquier esfuerzo físico significativo (*walking wounded*)

**INTERMACS 7:** *Advanced NYHA Class 3* Paciente en clase funcional NYHA III sin balance hídrico inestable actual ni reciente (*Place holder*)



Gómez-Bueno, M, et al. Asistencia ventricular de larga duración en España (2007-2020). I informe del registro REGALAD

**Figura 1 del material adicional.** A: Análisis de riesgos competitivos de los pacientes con asistencias de flujo pulsátil y corazón artificial total. B: Análisis de riesgos competitivos de los pacientes con asistencias de flujo continuo.

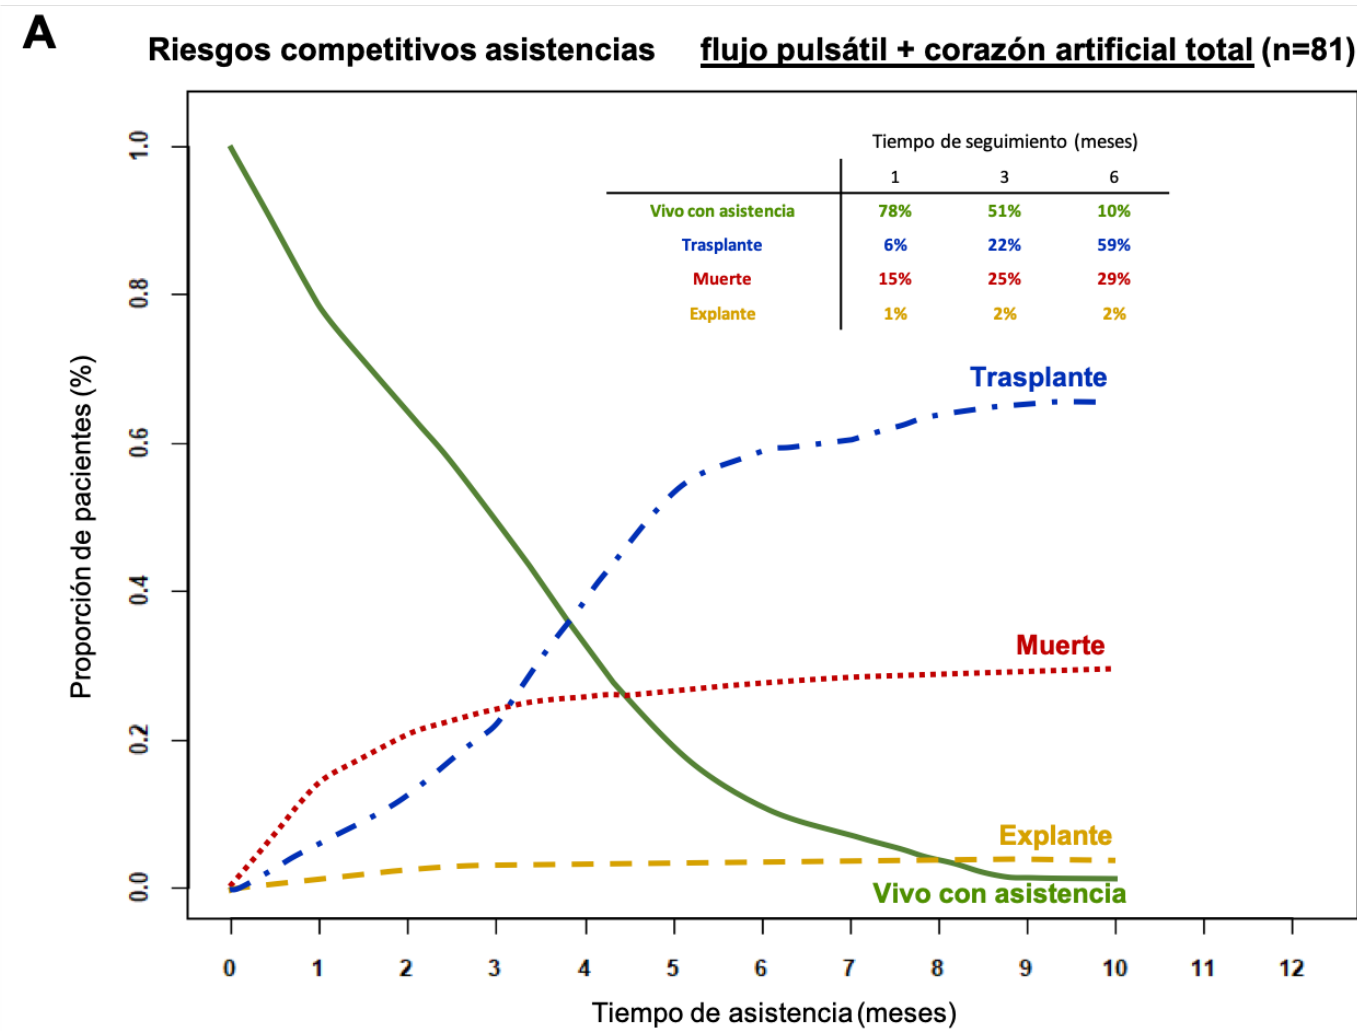

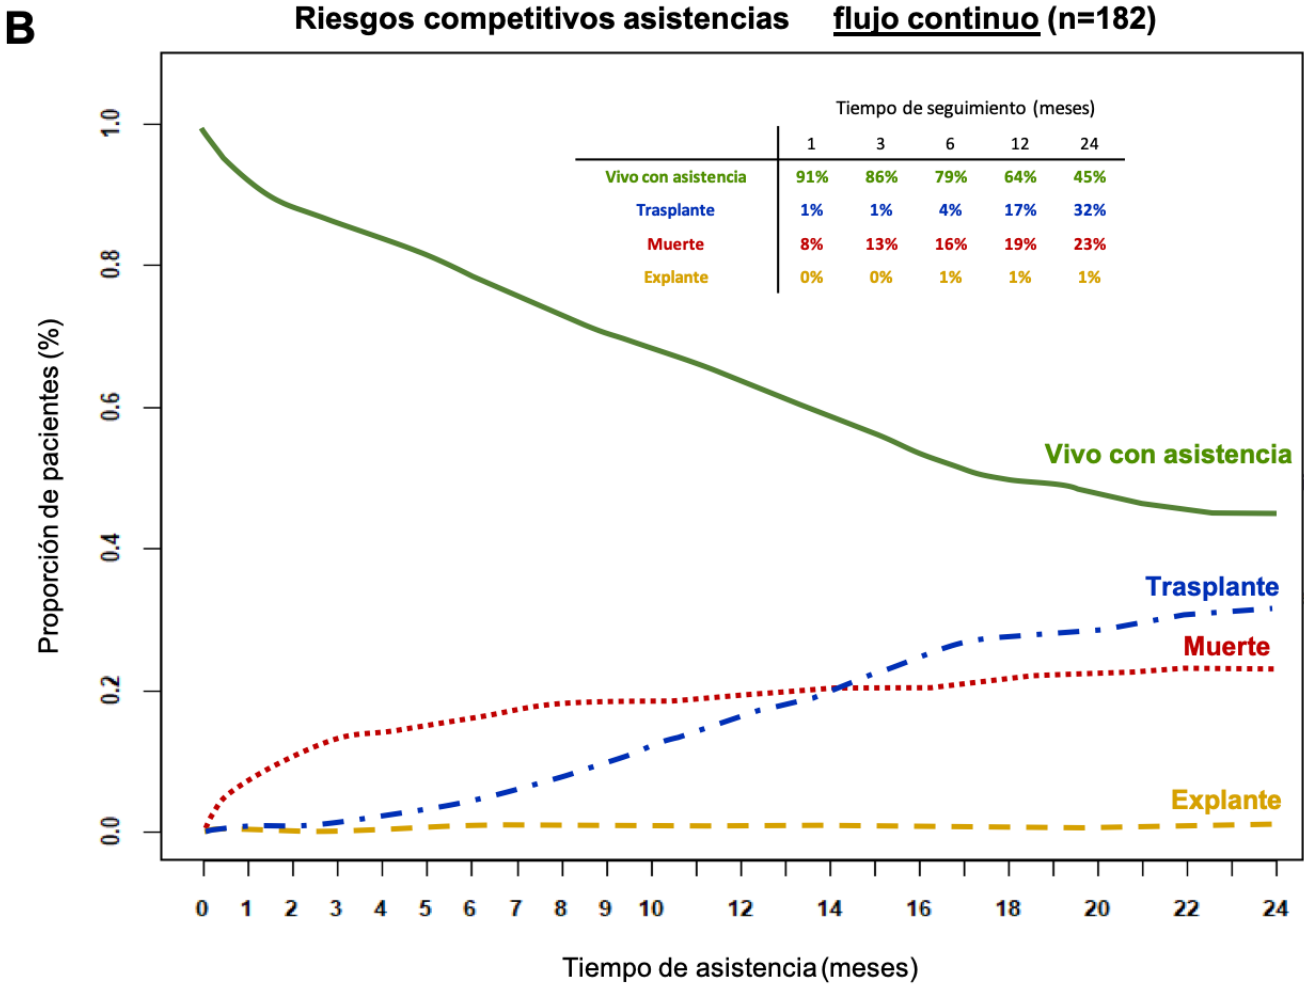

Supplement: mmc1 [file S0300893222002792:mmc1.pdf]
